# Supplementary material for: Epigallocatechin gallate (EGCG) alleviates the inflammatory response and recovers oral microbiota in acetic acid-induced oral inflammation mice
Source: Royal Society of Chemistry journal article supplement (doi:10.1039/d3fo03107a), 2023-01-01
Supplement: d3fo03107a1.pdf [file d3fo03107a1.pdf]

## 1 Supplementary information

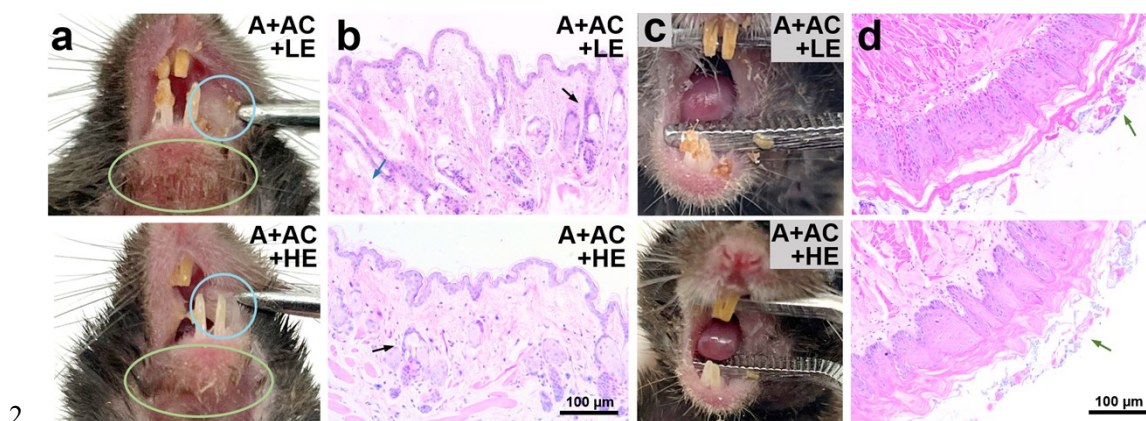

### 3 **Figure S1. Effects of EGCG on cheek pouch and tongue inflammation in the germ**

4 **reduced mice.** Representative (a) photographs and (b) H&E staining images of mice

5 cheek pouches in different treatment groups. Representative (c) photographs and (d)

6 H&E staining images of mice tongues in different treatment groups. The blue and green

7 circles indicate ulceration and swelling, respectively. The green, blue, and black arrows

8 denote the destruction of the exfoliated cuticle, muscle disorder, and hyperplasia of

9 gland acinar cells, respectively. A+AC+LE, acetic acid induced inflammation +

10 antibiotic cocktail treated + 2.5 mg/mL EGCG treated group; A+AC+HE, acetic acid

11 induced inflammation + antibiotic cocktail treated + 5.0 mg/mL EGCG treated group.

12

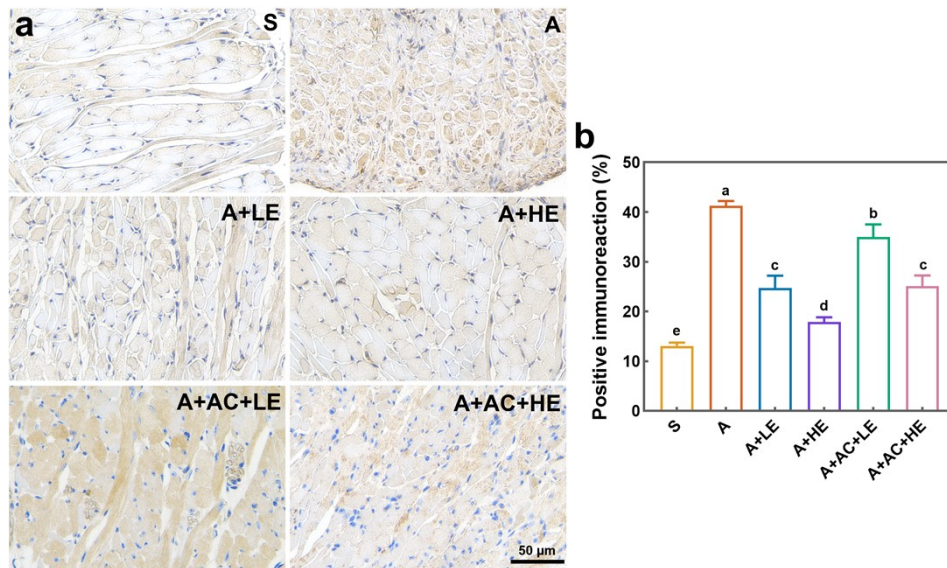

13

14 **Figure S2. Effect of EGCG on the expression of IL-6 in mice tongues. (a)**

15 Representative IHC staining images and (b) semi-quantitative analysis of IL-6 in mice

16 tongues. Bars without any same letters labeled were significantly different ( $p < 0.05$ ).

17 S, saline treated group; A, acetic acid induced inflammation + saline treated group;

18 A+LE, acetic acid induced inflammation + 2.5 mg/mL EGCG treated group; A+HE,

19 acetic acid induced inflammation + 5.0 mg/mL EGCG treated group; A+AC+LE, acetic

20 acid induced inflammation + antibiotic cocktail treated + 2.5 mg/mL EGCG treated

21 group; A+AC+HE, acetic acid induced inflammation + antibiotic cocktail treated + 5.0

22 mg/mL EGCG treated group.

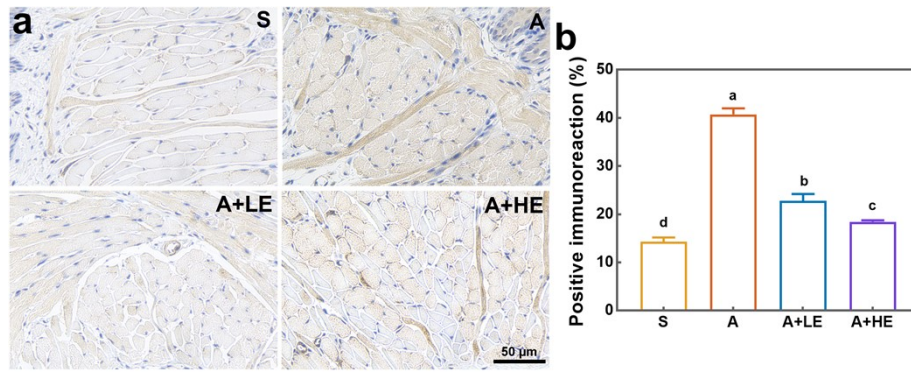

23

24 **Figure S3. Effect of EGCG on the expression of TNF- $\alpha$  in mice tongues.** (a)

25 Representative IHC staining images and (b) semi-quantitative analysis of TNF- $\alpha$  in

26 mice tongues. Bars without any same letters labeled were significantly different ( $p <$

27 0.05). S, saline treated group; A, acetic acid induced inflammation + saline treated

28 group; A+LE, acetic acid induced inflammation + 2.5 mg/mL EGCG treated group;

29 A+HE, acetic acid induced inflammation + 5.0 mg/mL EGCG treated group.

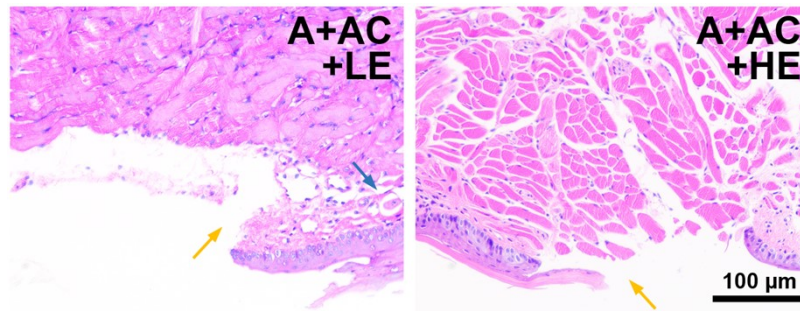

30

31 **Figure S4. Representative H&E staining images of throats in the germ reduced**  
32 **mice.** The yellow and blue arrows indicate the detached epithelium and submucosal  
33 edema, respectively. A+AC+LE, acetic acid induced inflammation + antibiotic cocktail  
34 treated + 2.5 mg/mL EGCG treated group; A+AC+HE, acetic acid induced  
35 inflammation + antibiotic cocktail treated + 5.0 mg/mL EGCG treated group.

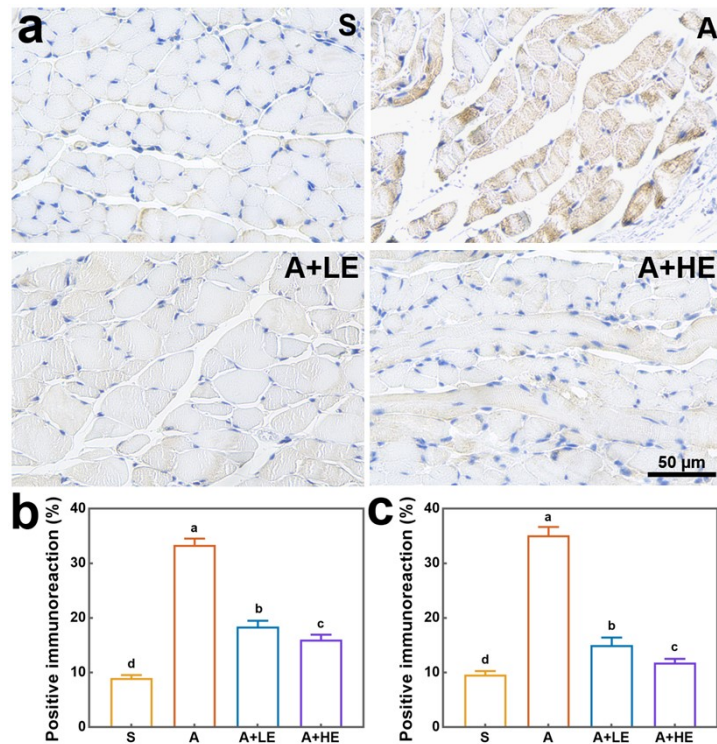

36

37 **Figure S5. Effects of EGCG on the expressions of IL-6 and TNF- $\alpha$  in the throats.**

38 (a) Representative IHC staining images of TNF- $\alpha$  in mice throats. Immunohistochemical semi-

39 quantitative analysis of (b) TNF- $\alpha$  and (c) IL-6 in the throats. Bars without any same letters

40 labeled were significantly different ( $p < 0.05$ ). S, saline treated group; A, acetic acid

41 induced inflammation + saline treated group; A+LE, acetic acid induced inflammation

42 + 2.5 mg/mL EGCG treated group; A+HE, acetic acid induced inflammation + 5.0

43 mg/mL EGCG treated group.

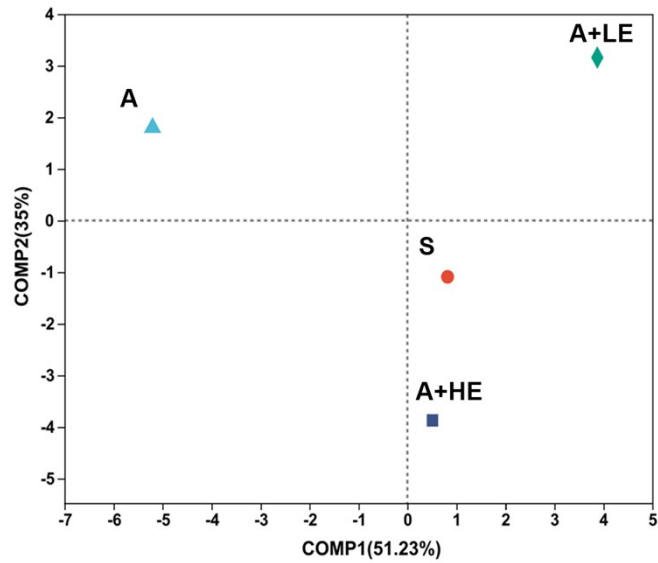

44

45 **Figure S6. PLS-DA analysis plots based on class level.** S, saline treated group; A,  
46 acetic acid induced inflammation + saline treated group; A+LE, acetic acid induced  
47 inflammation + 2.5 mg/mL EGCG treated group; A+HE, acetic acid induced  
48 inflammation + 5.0 mg/mL EGCG treated group.

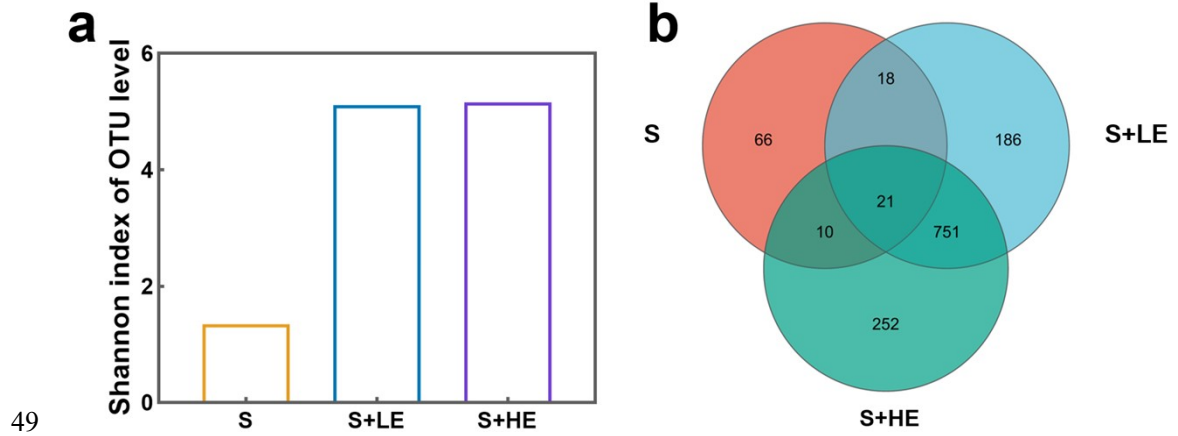

49

50 **Figure S7. Effects of EGCG on oral microbial diversity in normal mice.** (a)  $\alpha$ -

51 diversity represented by the Shannon index of OTU level. (b) Venn diagram of OTU.

52 S, saline treated group; S+LE, saline treated + 2.5 mg/mL EGCG treated group; S+HE,

53 saline treated + 5.0 mg/mL EGCG treated group.

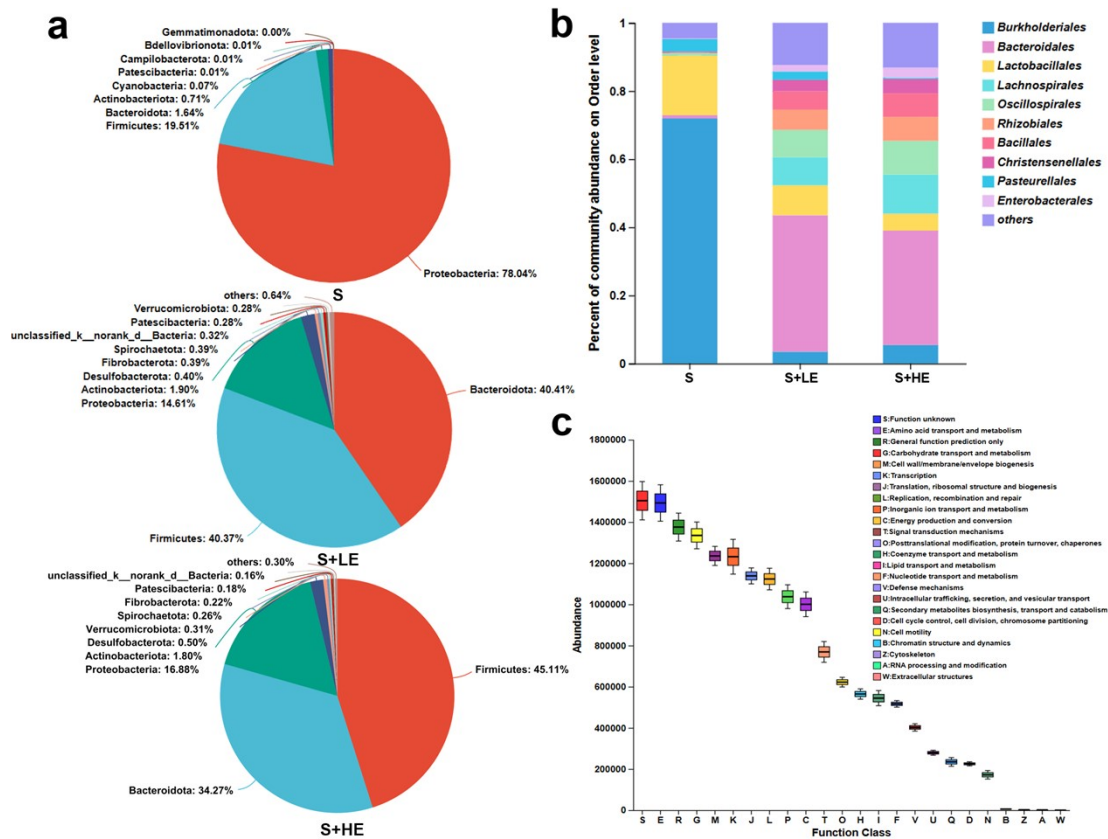

54

55 **Figure S8. Effects of EGCG on the composition and functions of oral microbiota**

56 **in normal mice. (a-b) The relative abundance of oral microbiota at (a) phylum level**

57 **and (b) order level. (c) The microbial function analyzed by PICRUSt1 program in the**

58 **COG database. S, saline treated group; S+LE, saline treated + 2.5 mg/mL EGCG treated**

59 **group; S+HE, saline treated + 5.0 mg/mL EGCG treated group.**
